# Supplementary material for: Las reglas del subconsciente
Source: Royal Society of Chemistry journal article supplement (doi:10.1039/c5mt00100e), 2000-01-01
Supplement: c5mt00100e2.pdf [file c5mt00100e2.pdf]

## SUPPLEMENTARY TABLE & FIGURE LEGENDS

Supplementary Table 1. Metal binding affinities of *baMntA* as determined by isothermal titration calorimetry (ITC). Also shown are the standard errors of the fit to the data.

Supplementary Figure 1. Overexpression and purification of *baMntA*. (A) The soluble fraction of cells transformed with plasmid *p-mntA* was isolated before or after addition of IPTG, as indicated. 50  $\mu\text{g}$  total protein were separated by SDS-PAGE and visualized by coomassie staining. A prominent band of  $\sim 35$  kDa (corresponding to the expected molecular weight of *baMntA*) is observed only in of extracts prepared from induced cells. (B) The soluble fraction of cells overexpressing *baMntA* was loaded onto an ion-exchange column and the column-UNBOUND fraction was collected and concentrated (not shown). This fraction was then injected onto a 120 mL preparative gel filtration column (HiLoad 16/600 Superdex 200). Shown is a coomassie staining of SDS-PAGE of the gel filtration elution fractions. The boxed fractions were pooled, and re-concentrated to 25-30 mg/mL and the 3  $\mu\text{g}$  of the final product is shown in the leftmost lane. (C) 5  $\mu\text{L}$  of purified *baMntA* at 30 mg/mL were injected onto a 24 mL 10/300 Superdex 200 gel filtration column. (D) 150  $\mu\text{g}$  each from vitamin B12, carbonic anhydrase, ovalbumin, and conalbumin were injected onto the same column as in C and their elution volumes were used to generate a standard curve (see methods). The molecular weights of the markers (in kDa) are given in parenthesis, the *baMntA* data point is shown in red. Also shown is the goodness of the fit,  $R^2$ .

Supplementary Figure 2. Quality assessment of the *ba*MntA model. (A) Ramachandran plots for the template (MtsA, PDB ID 3HH8) and the model, as indicated. Red, brown, yellow, and off-white areas represent most to least favorable phi-psi combinations, respectively. Each blue dot is one residue. Almost all of the residues of the model are within the highly favorable areas with a very similar distribution to that of the template. (B) ProSA results: The Z-score indicates overall model quality. Its value is displayed in a plot that contains the Z -scores of all experimentally determined protein chains currently in the PDB. In this plot, groups of structures from different sources are distinguished by different colors (X-ray in pale blue, NMR in blue). The score of the structure of interest (template and model) is highlighted in black. The model was assigned a slightly better score than the template (Z-scores of -8.99 and -8.38, respectively), and both reside in the allowed score area. (C) ConSurf analysis of the distribution of conserved and variable residues in the modeled structure of *ba*MntA. For comparison the same analysis was performed on the homologous PsaA (PDB I.D 1PSZ) that was not used as a template for modeling of *ba*MntA. The proteins' backbone is shown in a cartoon representation, colored according to the ConSurf scale. The distribution of conserved and variable residues is very similar in PsaA and *ba*MntA with a highly conserved core and a variable surface.

Supplementary Figure 3. Amino acid sequence alignment of *Bacillus anthracis* MntA, *Streptococcus pneumoniae* PsaA, *Treponema pallidum* TroA, *Escherichia coli* ZnuA, *Synechocystis sp.* MntC, and *Streptococcus pyogenes* MtsA. Metal coordinating residues are highlighted in yellow and green.
